# Supplementary material for: Focusing on scRNA-seq-Derived T Cell-Associated Genes to Identify Prognostic Signature and Immune Microenvironment Status in Low-Grade Glioma
Source: Hindawi journal article supplement (doi:10.1155/2023/3648946), 2023-05-31

**A**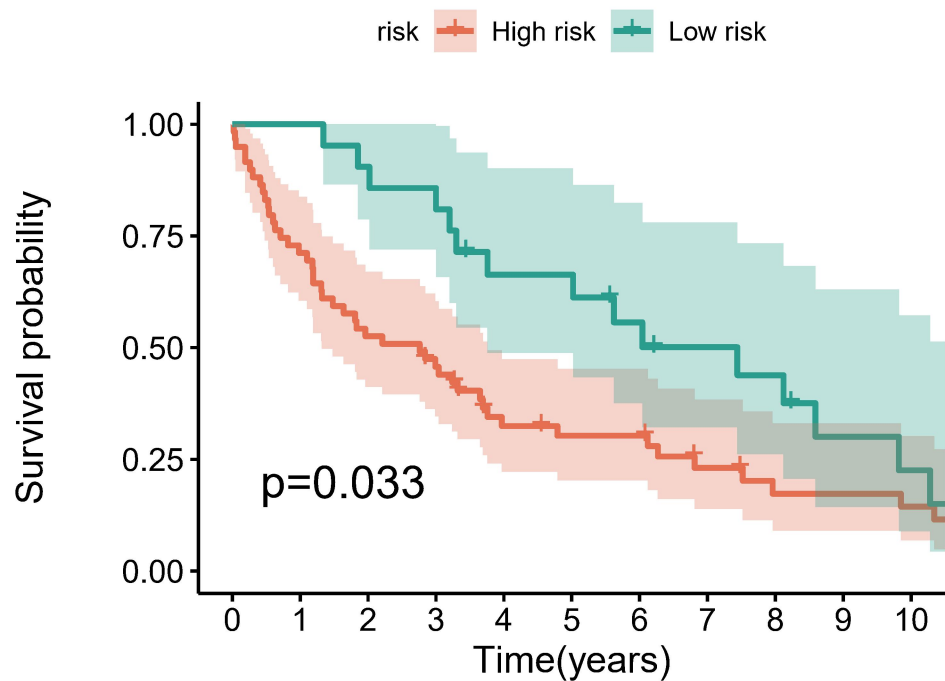

| risk | High risk | Low risk |
|------|-----------|----------|
| 0    | 59        | 21       |
| 1    | 42        | 21       |
| 2    | 31        | 19       |
| 3    | 26        | 18       |
| 4    | 16        | 13       |
| 5    | 14        | 13       |
| 6    | 14        | 10       |
| 7    | 9         | 8        |
| 8    | 6         | 7        |
| 9    | 6         | 4        |
| 10   | 5         | 3        |

Time(years)

**B**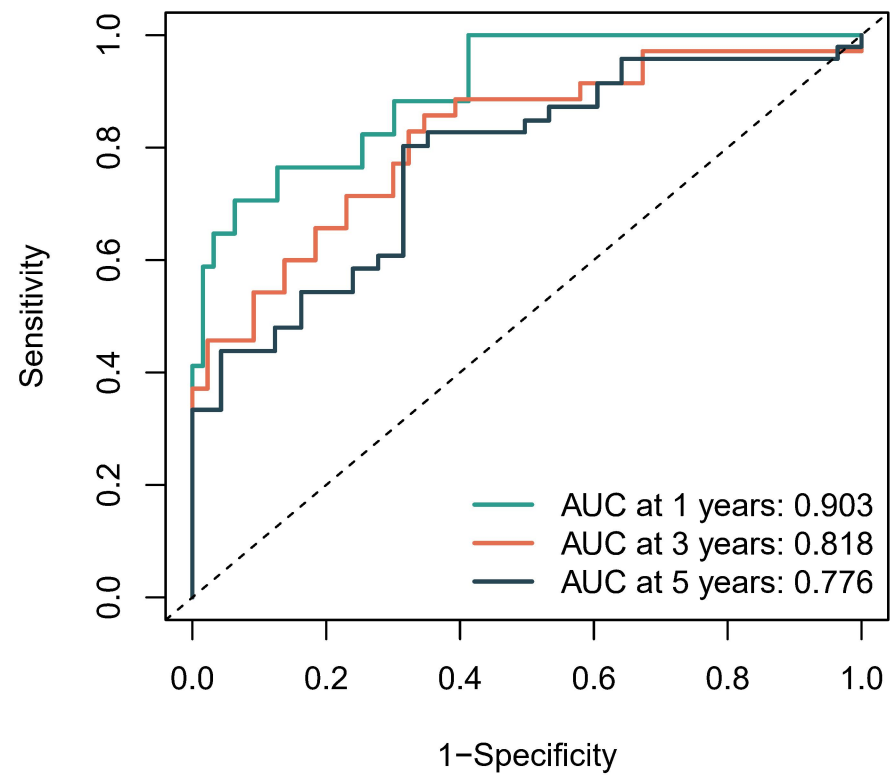

Supplement: f1 [file 3648946.f1.pdf]
